# Supplementary material for: Hexagonal α-Fe2O3 nanorods bound by high-index facets as high-performance electrochemical sensor
Source: Royal Society of Chemistry journal article supplement (doi:10.1039/c2ta00987k), 2012-12-21
Supplement: c2ta00987k.pdf [file c2ta00987k.pdf]

## Supporting information

### Hexagonal $\alpha$ -Fe<sub>2</sub>O<sub>3</sub> nanorods bound by high-index facets as high-performance electrochemical sensor

Zhong Liu<sup>1</sup>, Baoliang Lv<sup>1\*</sup>, Yao Xu<sup>1</sup>, Dong Wu<sup>1</sup>

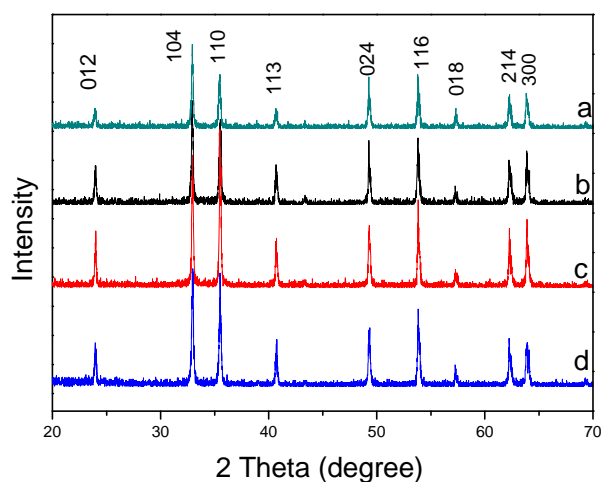

**Figure S1:** XRD patterns particles obtained with different reaction time: (a) 2h, (b) 4h, (c) 12h and (d) 48h.

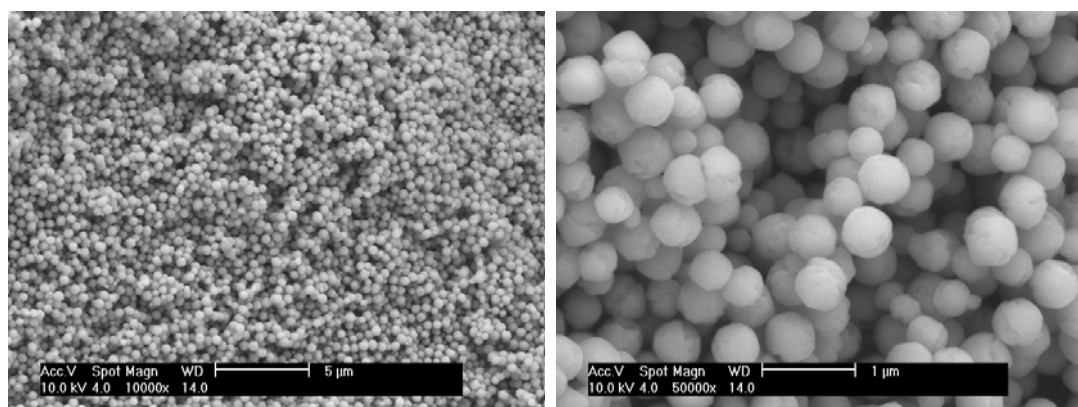

**Figure S2:**  $\alpha$ -Fe<sub>2</sub>O<sub>3</sub> obtained with adding 0.2 M formamide.
